# Supplementary material for: Evaluating pre-consult patient education videos for patients with newly-diagnosed anal squamous cell carcinoma: Impact on patient comprehension, satisfaction and distress
Source: PubMed Central journal article supplement — Tech Innov Patient Support Radiat Oncol. 2024 Aug 21;32:100271. doi: 10.1016/j.tipsro.2024.100271 (PMC11472093; doi:10.1016/j.tipsro.2024.100271), 2024-08-21
Supplement: mmc1.pdf [file mmc1.pdf]

# Patient Education Survey

Please complete the questionnaire below. It should take about 10-20 minutes of your time.

Thank you!

**We are trying to understand what you know about anal cancer and its treatment. This questionnaire contains 30 multiple choice questions; please answer them to the best of your ability.**

- 1) Since your anal cancer diagnosis, have you spent time researching or learning about this disease?  Yes  
 No
- 
- 2) Since your anal cancer diagnosis, have you spoken with another oncology doctor (medical oncologist, radiation oncologist or surgeon) about this disease?  Yes  
 No
- 
- 3) Which sources have you used to learn about anal cancer so far?
- Primary doctor/Doctor who diagnosed this cancer
  - Friend or family member
  - General internet search
  - Hospital webpage
  - Online support group
  - Facebook
  - Twitter
  - Other Social Media
  - Other
- 
- 4) If you checked "other"- can you tell us a little bit about the additional sources/resources you used to learn about your cancer and its treatment? \_\_\_\_\_
- 
- 5) How much do you feel like you know/understand about anal cancer right now?  Nothing at all  
 A little bit  
 Some  
 Quite a bit  
 A lot
- 
- 6) Which of the following is a risk factor for anal cancer?  Human papillomavirus (HPV) infection  
 Cigarette smoking  
 Weakened immune system  
 All of the above
- 
- 7) Which of the following is true about human papillomavirus (HPV) infection?  It is transmitted through sexual or skin to skin contact  
 It is a rare sexually transmitted disease  
 It only infects people with more than 10 sexual partners  
 There is no effective vaccine against it
- 
- 8) Which of the following tests is most helpful for measuring the size of an anal tumor?  X-ray  
 Digital rectal exam  
 Endoscopy (camera scope)  
 Computed tomography (CT) scan
- 
- 9) Which of the following tests is most helpful to determine if anal cancer has spread to lymph nodes in the pelvis?  X-ray  
 Digital rectal exam  
 Endoscopy (camera scope)  
 Computed tomography (CT) scan

- 
- 10) Which of the following is used to determine the overall stage of anal cancer?
- Size and extent of the anal cancer
  - Whether and which lymph nodes are involved with cancer
  - Spread of cancer to other organs outside the pelvis
  - All of the above
- 
- 11) What is the recommended curative treatment for most stage I, II and III anal cancer?
- Surgery alone
  - Radiation therapy alone
  - Chemotherapy alone
  - Radiation and chemotherapy given together
- 
- 12) Which is true about radiation therapy for anal cancer?
- It uses a beam of high-energy x-rays to destroy cancer cells
  - It uses radioactive seeds that are implanted in the tumor
  - It causes the patient to be radioactive during treatment
  - All of the above
- 
- 13) How often is radiation therapy given for anal cancer?
- 5 days per week for 2-3 weeks
  - 7 days per week for 2-3 weeks
  - 5 days per week for 5-6 weeks
  - 7 days per week for 5-6 weeks
- 
- 14) What is the radiation oncologist's job?
- Plan radiation therapy
  - Treat side effects from radiation therapy
  - Prescribe chemotherapy
  - Both 1 and 2
  - All of the above
- 
- 15) What type of surgery is usually needed if radiation and chemotherapy do not cure anal cancer?
- Removal of the tumor only
  - Removal of the anal canal, rectum and lymph nodes but NO PERMANENT COLOSTOMY
  - Removal of the anal canal, rectum and lymph nodes WITH A PERMANENT COLOSTOMY
  - None of the above
- 
- 16) What is done at a radiation simulation appointment?
- Make a mold to hold your body in the same position as it will be during treatment
  - Take a CT scan of your pelvis for radiation treatment planning
  - Deliver the first dose of radiation therapy
  - Both 1 and 2
  - All of the above
- 
- 17) What should you do to prepare for your radiation simulation appointment?
- Empty your bladder immediately before the appointment
  - Drink 16-20 ounces of water one hour before the appointment
  - Fast for 24 hours
  - Fast for 12 hours
- 
- 18) What is the most common position of the body for radiation treatment?
- Lying on your stomach
  - Lying on your back with your legs straight
  - Lying on your back with you legs in a "frog leg" position
  - Lying on your side

- 
- 19) How long will the radiation treatment appointments take each day?
- 2 minutes
  - 20 minutes
  - 2 hours
  - 6 hours
- 
- 20) After radiation treatments start, which additional visits will you need every week?
- Blood tests
  - Weekly clinic visits with the radiation oncologist
  - Chemotherapy infusions
  - All of the above
- 
- 21) Which of the following is a possible early side effect from radiation for anal cancer?
- Fatigue
  - Loss of hair on head
  - Diabetes
  - All of the above
- 
- 22) Where does radiation dermatitis ("skin burn") usually develop during radiation treatment for anal cancer?
- Face
  - Skin around the anus
  - Groin creases
  - Both 2 and 3
  - All of the above
- 
- 23) Which is a possible bowel side effect that can happen during radiation treatment for anal cancer?
- Sharp pain during bowel movements
  - Bleeding from the anus
  - Urgent bowel movements
  - All of the above
- 
- 24) Which strategy can help manage side effects from radiation treatment for anal cancer?
- Soak in a sitz bath to soothe irritated skin
  - Wear loose clothing for comfort
  - Eat a low fiber diet and take medications for diarrhea
  - All of the above
- 
- 25) When are radiation side effects usually the worst?
- First week of radiation treatments
  - Middle of the radiation treatments
  - Last week of the radiation treatments
  - 1-2 weeks after radiation treatments are done
- 
- 26) Which body part might be permanently damaged from radiation treatment for anal cancer, and what problem might the damage cause in the long-term?
- Brain; memory loss
  - Stomach; nausea and vomiting
  - Pelvic bones; fracture
  - All of the above
- 
- 27) Bowel habits can permanently change after radiation treatment for anal cancer. Which is a possible long-term/permanent bowel side effect?
- Inflammation of the bowel (proctitis) leading to bleeding and diarrhea
  - Narrowing of the anal canal (stenosis) leading to constipation and pain
  - Damage to the sphincter muscles leading to incontinence of stool
  - All of the above
- 
- 28) What is the approximate risk of radiation causing bowel damage so severe that a permanent colostomy bag is needed?
- 0%
  - 2-5%
  - 10-20%
  - 30-50%

- 
- 29) Sexual function can permanently change after radiation for anal cancer. Which is a common long-term sexual side effect?
- Priapism (unwanted erections that last more than 4 hours)
  - Vaginal stenosis (shortening and narrowing of the vaginal canal)
  - Increased libido (sex drive)
  - All of the above
- 
- 30) What treatment can help the long-term side effects of radiation treatment for anal cancer?
- Regular vaginal dilator use
  - Bone density testing and treatment of low bone density
  - Pelvic floor physical therapy
  - All of the above
